# Supplementary material for: How do Parents Manage Irritability, Challenging Behaviour, Non-Compliance and Anxiety in Children with Autism Spectrum Disorders? A Meta-Synthesis
Source: PubMed Central journal article supplement (PMC5861158; doi:10.1007/s10803-017-3361-4), 2017-12-08
Supplement: 10803_2017_3361_MOESM1_ESM.pdf [file 10803_2017_3361_MOESM1_ESM.pdf]

**Supplementary Materials for “*How do parents manage irritability, challenging behaviour, non-compliance and anxiety in children with autism spectrum disorders? A meta-synthesis*”**

**Elizabeth O’Nions, Francesca Happé, Kris Evers, Hannah Boonen & Ilse Noens**

**Contents:**

**Supplementary Table 1: Demographic information for case studies/ descriptions (n = 15)**

**Supplementary Table 2: Demographic information for case series (n = 8)**

**Supplementary Table 3: Demographic information for qualitative studies (n = 50)**

**Supplementary Table 4: Summary of themes and references for exemplars coded as belonging to each subtheme**

**Supplementary Table 1: Demographic information for case studies/ descriptions (n = 15)**

| <b>Author</b>                      | <b>Study focus/<br/>location</b>                           | <b>Sample</b>                                                                                 | <b>Ethnicity<br/>(parent or<br/>child)</b> | <b>Proportion<br/>of parents<br/>who were<br/>mothers</b> | <b>Parent<br/>educational<br/>qualifications</b> | <b>Age of<br/>child<br/>(years)</b> | <b>Child<br/>gender</b> | <b>Child intellectual<br/>disability and/or delay<br/>relative to peers and/or<br/>non-verbal/ limited<br/>speech</b> |
|------------------------------------|------------------------------------------------------------|-----------------------------------------------------------------------------------------------|--------------------------------------------|-----------------------------------------------------------|--------------------------------------------------|-------------------------------------|-------------------------|-----------------------------------------------------------------------------------------------------------------------|
| <b>Agazzi et al. 2013</b>          | Parent-child interaction therapy (US)                      | Parents of child diagnosed with ID, ASD, ODD, stereotypic movement disorder, primary insomnia | Not given                                  | 1/2                                                       | Not given                                        | 7                                   | M                       | Yes (diagnosis of ID)                                                                                                 |
| <b>Armstrong et al. 2013</b>       | Parent-child interaction therapy (US)                      | Parents of a child diagnosed with Asperger's, ADHD, ODD, OCD                                  | Not given                                  | 1/2                                                       | Not given                                        | 5                                   | M                       | No (IQ in superior range)                                                                                             |
| <b>Armstrong et al. 2015</b>       | Parent-child interaction therapy with visual supports (US) | Parents of a child diagnosed with epilepsy, ASD, ID and ADHD                                  | Not given                                  | 1/2                                                       | Not given                                        | 5                                   | F                       | Yes (diagnosis of ID)                                                                                                 |
| <b>Barry and Singer 2001</b>       | Clinician-implemented treatment (US)                       | Parents of a child diagnosed with limited speech, autism, aggressive behaviour                | Not given                                  | 1/2                                                       | Not given                                        | 10                                  | M                       | Yes (limited speech)                                                                                                  |
| <b>Becker-Cottrill et al. 2003</b> | Implementation of multi-component intervention (US)        | Parents of a child diagnosed with autism                                                      | Not given                                  | 1/2                                                       | Not given                                        | 4                                   | M                       | Yes (limited speech)                                                                                                  |
| <b>Clarke et al. 1999</b>          | Family-centred assessment-based intervention (US)          | Parents of a child diagnosed with Asperger's, non-compliance and tantrums                     | Not given                                  | 1/2                                                       | Not given                                        | 10                                  | M                       | No (Asperger's diagnosis)                                                                                             |

| <b>Author</b>                  | <b>Study focus/<br/>location</b>                        | <b>Sample</b>                                                              | <b>Ethnicity<br/>(parent or<br/>child)</b> | <b>Proportion<br/>of parents<br/>who were<br/>mothers</b> | <b>Parent<br/>educational<br/>qualifications</b> | <b>Age of<br/>child<br/>(years)</b> | <b>Child<br/>gender</b> | <b>Child intellectual<br/>disability and/or delay<br/>relative to peers and/or<br/>non-verbal/ limited<br/>speech</b> |
|--------------------------------|---------------------------------------------------------|----------------------------------------------------------------------------|--------------------------------------------|-----------------------------------------------------------|--------------------------------------------------|-------------------------------------|-------------------------|-----------------------------------------------------------------------------------------------------------------------|
| <b>Flood and Luiselli 2016</b> | Desensitization treatment (US)                          | Parents of a child diagnosed with autism                                   | Not given                                  | 1/2                                                       | Not given                                        | 7                                   | M                       | Yes (verbal but limited expressive language)                                                                          |
| <b>Johnson et al. 1978</b>     | Home-based therapeutic intervention (US)                | Parents of a child diagnosed with autism                                   | Not given                                  | 1/2                                                       | Well-educated                                    | 4                                   | F                       | Not given                                                                                                             |
| <b>Lucyshyn et al. 2007</b>    | Positive behaviour support approach (US)                | Parents of a child diagnosed with severe ID, autism, challenging behaviour | Not given                                  | 1/2                                                       | Not given                                        | 5                                   | F                       | Yes (diagnosis of ID)                                                                                                 |
| <b>Moes and Frea 2000</b>      | Prescriptive vs. contextualized treatment approach (US) | Parents of a child diagnosed with autism, mood disorder                    | Not given                                  | 1/2                                                       | Not given                                        | 3                                   | M                       | No (age appropriate cognitive abilities)                                                                              |
| <b>Nadeau et al. 2015</b>      | Behaviourally oriented psychosocial intervention (US)   | Parents of a child diagnosed with autism, GAD, social phobia               | Hispanic                                   | 1/2                                                       | Not given                                        | 4                                   | M                       | Yes (minimal expressive language)                                                                                     |
| <b>Neufeld et al. 2014</b>     | Effectiveness of multi-component intervention (Canada)  | Mother of a child diagnosed with autism and anxiety problems               | Not given                                  | 1/1                                                       | Not given                                        | 5                                   | M                       | No (verbal, spoke in full sentences)                                                                                  |
| <b>Ökcün et al. 2012</b>       | Parent behaviours to support play with peers (Turkey)   | Mother of a child diagnosed with autism                                    | Not given                                  | 1/1                                                       | Not given                                        | 9                                   | M                       | Not given                                                                                                             |

| <b>Author</b>                    | <b>Study focus/<br/>location</b>    | <b>Sample</b>                                                                                             | <b>Ethnicity<br/>(parent or<br/>child)</b> | <b>Proportion<br/>of parents<br/>who were<br/>mothers</b> | <b>Parent<br/>educational<br/>qualifications</b> | <b>Age of<br/>child<br/>(years)</b> | <b>Child<br/>gender</b> | <b>Child intellectual<br/>disability and/or delay<br/>relative to peers and/or<br/>non-verbal/ limited<br/>speech</b> |
|----------------------------------|-------------------------------------|-----------------------------------------------------------------------------------------------------------|--------------------------------------------|-----------------------------------------------------------|--------------------------------------------------|-------------------------------------|-------------------------|-----------------------------------------------------------------------------------------------------------------------|
| <b>Sabapathy<br/>et al. 2016</b> | Aggressive<br>behaviour (US)        | Parents of a child<br>diagnosed with ASD,<br>seizure disorder,<br>moderate ID and<br>aggressive behaviour | Hispanic                                   | 1/2                                                       | Not given                                        | 13                                  | F                       | Yes (diagnosis of ID)                                                                                                 |
| <b>Vaughn et<br/>al. 2002</b>    | Family-centred<br>intervention (US) | Parents of child<br>diagnosed with severe<br>ID, autism, challenging<br>behaviour                         | African-<br>American                       | 1/2                                                       | Not given                                        | 7                                   | M                       | Yes (diagnosis of ID)                                                                                                 |

**Notes:** Abbreviations: US = United States of America; ASD = Autism spectrum disorder; ID = intellectual disability; GAD = Generalised Anxiety Disorder; ODD = Oppositional Defiant Disorder; OCD = Obsessive compulsive disorder; M = Male; F = Female.

**Supplementary Table 2: Demographic information for case series (n = 8)**

| <b>Author</b>                | <b>Study focus/<br/>location</b>                                | <b>Sample</b>                                                                                                                    | <b>Ethnicity<br/>(parent or<br/>child)</b> | <b>Proportion<br/>of parents<br/>who were<br/>mothers</b> | <b>Parent<br/>educational<br/>qualifications</b> | <b>Age of<br/>children<br/>[years] mean<br/>(range)</b> | <b>Proportion<br/>of children<br/>who were<br/>female</b> | <b>Proportion of<br/>children with<br/>intellectual<br/>disability (ID)<br/>and/or delay<br/>relative to peers<br/>and/or non-verbal/<br/>limited speech</b> |
|------------------------------|-----------------------------------------------------------------|----------------------------------------------------------------------------------------------------------------------------------|--------------------------------------------|-----------------------------------------------------------|--------------------------------------------------|---------------------------------------------------------|-----------------------------------------------------------|--------------------------------------------------------------------------------------------------------------------------------------------------------------|
| <b>Bailey and Blair 2015</b> | Family-centred Prevent-Teach-Reinforce (US)                     | Parents of children diagnosed with ASD or language delay, sensory processing problems, problem behaviour <sup>a</sup>            | Caucasian                                  | 3/6                                                       | Not given                                        | 6 (5 - 7)                                               | 0/3                                                       | 3/3 (limited speech)                                                                                                                                         |
| <b>Blair et al. 2011</b>     | Individualised behaviour support (South Korea)                  | Parents of children diagnosed with ID, autism, challenging behaviour, non-compliance, self-injury, cerebral palsy (1/3)          | Not given                                  | 3/3                                                       | 33% High school diploma; 67% College degrees     | 4.8 (4 - 5)                                             | 1/3                                                       | 3/3 (diagnosis of ID)                                                                                                                                        |
| <b>Fettig et al. 2015</b>    | Coaching to support parenting intervention (US)                 | Parents of children diagnosed with autism or sensory integration disorder and challenging behaviour/poor compliance <sup>a</sup> | Not given                                  | 3/6                                                       | Not given                                        | 4.4 (2 - 6)                                             | 1/3                                                       | 1/3 (cognitive delays)                                                                                                                                       |
| <b>Hampshire et al. 2011</b> | Parent training, self-management and homework independence (US) | Parents of children with ASD who experienced homework challenges                                                                 | Not given                                  | 5/5                                                       | Not given                                        | (11 - 14)                                               | 1/5                                                       | Not given                                                                                                                                                    |
| <b>Lucyshyn et al. 2004</b>  | Coercive cycles in unsuccessful family routines (US)            | Parents of children with ASD, delayed language skills or mild to moderate mental retardation <sup>a</sup>                        | Not given                                  | 10/12                                                     | Not given                                        | (4 - 8)                                                 | Not given                                                 | 6/10 (non-verbal or delayed language)                                                                                                                        |

| <b>Author</b>                 | <b>Study focus/<br/>location</b>                       | <b>Sample</b>                                                 | <b>Ethnicity<br/>(parent or<br/>child)</b> | <b>Proportion<br/>of parents<br/>who were<br/>mothers</b>                   | <b>Parent<br/>educational<br/>qualifications</b> | <b>Age of<br/>children<br/>[years] mean<br/>(range)</b> | <b>Proportion<br/>of children<br/>who were<br/>female</b> | <b>Proportion of<br/>children with<br/>intellectual<br/>disability (ID)<br/>and/or delay<br/>relative to peers<br/>and/or non-verbal/<br/>limited speech</b> |
|-------------------------------|--------------------------------------------------------|---------------------------------------------------------------|--------------------------------------------|-----------------------------------------------------------------------------|--------------------------------------------------|---------------------------------------------------------|-----------------------------------------------------------|--------------------------------------------------------------------------------------------------------------------------------------------------------------|
| <b>Preece and Almond 2008</b> | Structured teaching approaches (UK)                    | Parents of children on the autism spectrum                    | Not given                                  | 2/3                                                                         | Not given                                        | 8.5 (6 – 11)                                            | 1/2                                                       | Not given                                                                                                                                                    |
| <b>Scarpinto et al. 2010</b>  | Management of behaviour in hospital setting (US)       | Health-care providers of hospitalised children with ASD       | Not given                                  | Not given (focus is health-care providers, also reported parent behaviours) | Not given                                        | (6 - 15)                                                | 1/9                                                       | Not given                                                                                                                                                    |
| <b>Sears et al. 2013</b>      | School-based Prevent-Teach-Reinforce intervention (US) | Parents of children diagnosed with ASD with problem behaviour | Caucasian                                  | 2/4                                                                         | Not given                                        | 5 (4 - 6)                                               | 0/2                                                       | 1/2 (non-verbal)                                                                                                                                             |

Abbreviations: US = United States of America; UK = United Kingdom; ASD = Autism spectrum disorder; PDD-NOS = Pervasive developmental disorder not otherwise specified; ID = intellectual disability; GAD = Generalised Anxiety Disorder; ODD = Oppositional Defiant Disorder; OCD = Obsessive compulsive disorder. Notes: <sup>a</sup> study includes a minority of children without an ASD.

**Supplementary Table 3: Demographic information for qualitative studies (n = 50)**

| Author                          | Study focus/<br>location                                 | Sample                                                                   | Ethnicity<br>(parent or child)                              | Proportion<br>of parents<br>who were<br>mothers | Parent<br>educational<br>qualifications                     | Age of<br>children<br>[years] mean<br>(range) | Proportion<br>of children<br>who were<br>female | Proportion of<br>children with<br>intellectual<br>disability (ID)<br>and/or delay<br>relative to peers<br>and/or non-verbal/<br>limited speech |
|---------------------------------|----------------------------------------------------------|--------------------------------------------------------------------------|-------------------------------------------------------------|-------------------------------------------------|-------------------------------------------------------------|-----------------------------------------------|-------------------------------------------------|------------------------------------------------------------------------------------------------------------------------------------------------|
| <b>Ausderau and Juarez 2013</b> | Eating challenges and mealtimes (US)                     | Parents of children with ASD and feeding challenges                      | 83% Caucasian, 17% Hispanic                                 | 6/6                                             | 17% High School; 67% College; 17% Advanced                  | 4.7 (2 - 7)                                   | Not given                                       | Not given                                                                                                                                      |
| <b>Aylaz et al. 2012</b>        | Parents' difficulties, impact on their sex life (Turkey) | Parents of children with autism                                          | Not provided                                                | 6/12                                            | 42% High school; 33% University; 25% Primary school         | 10 (6 - 14)                                   | Not given                                       | Not given                                                                                                                                      |
| <b>Bagatell 2016</b>            | Family routines and occupations (US)                     | Parents and siblings of children with moderate – severe ASD <sup>b</sup> | 60% Caucasian; 20% Hispanic; 20% African American           | 5/6                                             | 20% High school; 80% College                                | 14.8 (13 – 18)                                | 0/5                                             | Not given                                                                                                                                      |
| <b>Hebert 2014</b>              | Factors affecting choice of intervention (US)            | Parents of children with PDD-NOS or autism                               | 74% Caucasian; 17% African American; 9% Asian               | 14/23                                           | 17% High School; 22% College; 60% Advanced                  | 4.5 (3 - 6)                                   | 7/19                                            | 14/19 (diagnosed with autism rather than PDD-NOS or Asperger's)                                                                                |
| <b>Bearss et al. 2016</b>       | Anxiety behaviours and management (US)                   | Parents of children with ASD and anxiety                                 | 67% Caucasian, 4% Hispanic, 18% African American, 11% other | 41/48                                           | 27% Some college, 42% College graduate, 31% Advanced degree | 10.4 (3 - 17)                                 | 13/45                                           | 21/45 (diagnosed with autism rather than PDD-NOS or Asperger's)                                                                                |
| <b>Beer et al. 2013</b>         | Mindful parenting (Australia)                            | Parents of children with ASD                                             | 87% Caucasian                                               | 24/28                                           | 33% High school; 67% College or Advanced                    | 9.0 (3 - 20)                                  | 85.7% male (child N not given)                  | Not given                                                                                                                                      |

| Author                           | Study focus/<br>location                                          | Sample                                                                                           | Ethnicity<br>(parent or child)                   | Proportion<br>of parents<br>who were<br>mothers | Parent<br>educational<br>qualifications                                                          | Age of<br>children<br>[years] mean<br>(range)                  | Proportion<br>of children<br>who were<br>female | Proportion of<br>children with<br>intellectual<br>disability (ID)<br>and/or delay<br>relative to peers<br>and/or non-verbal/<br>limited speech |
|----------------------------------|-------------------------------------------------------------------|--------------------------------------------------------------------------------------------------|--------------------------------------------------|-------------------------------------------------|--------------------------------------------------------------------------------------------------|----------------------------------------------------------------|-------------------------------------------------|------------------------------------------------------------------------------------------------------------------------------------------------|
| <b>Bourke-Taylor et al. 2010</b> | Family impact: mothers' perspectives (Australia)                  | Mothers of children with autism or cerebral palsy <sup>c</sup>                                   | Not provided                                     | 2/2                                             | Not provided                                                                                     | 12 (9 - 15)                                                    | 1/2                                             | 1/2 (diagnosis of ID)                                                                                                                          |
| <b>Cullen and Barlow 2002</b>    | Caring for children attending touch therapy (UK)                  | Parents of children with autism                                                                  | 90% Caucasian; 10% Asian                         | 9/10                                            | Not provided                                                                                     | (2 - 13)                                                       | 1/10                                            | 6/10 (non-verbal/limited speech)                                                                                                               |
| <b>DeGrace et al. 2014</b>       | Lived experience: daily life (US)                                 | Parents of children with severe autism                                                           | Not provided                                     | 7/13                                            | Not provided                                                                                     | 12.4 (3 - 18)                                                  | Not given                                       | Not given                                                                                                                                      |
| <b>DeGrace 2004</b>              | Lived experience: daily life (US)                                 | Parents and siblings of children with autism <sup>b</sup>                                        | Not provided                                     | 5/10                                            | Not provided                                                                                     | 9.8 (9 - 10)                                                   | 2/5                                             | Not given                                                                                                                                      |
| <b>Dickie et al. 2009</b>        | Sensory experiences (US)                                          | Parents of children with or without autism (child data refers to autism sub-sample) <sup>c</sup> | 73% Caucasian; 16 % Black; 5% Hispanic; 5% Mixed | 37/37                                           | 27% High school; 16% Partial college; 41% College degree; 3% Beyond college; 16% Graduate degree | 4.43 (2-7)                                                     | Not given                                       | Not given                                                                                                                                      |
| <b>Divan et al. 2012</b>         | Challenges, coping strategies and unmet needs of families (India) | Parents and stakeholders of children with ASD <sup>c</sup>                                       | Not provided                                     | 9/12                                            | 10% School; 20% High school; 70% Graduate                                                        | Not provided, includes under 5 and above 20, majority under 18 | 1/10                                            | Not given                                                                                                                                      |



| <b>Author</b>                       | <b>Study focus/<br/>location</b>                                       | <b>Sample</b>                                                                 | <b>Ethnicity<br/>(parent or child)</b> | <b>Proportion<br/>of parents<br/>who were<br/>mothers</b> | <b>Parent<br/>educational<br/>qualifications</b>                                                             | <b>Age of<br/>children<br/>[years] mean<br/>(range)</b> | <b>Proportion<br/>of children<br/>who were<br/>female</b> | <b>Proportion of<br/>children with<br/>intellectual<br/>disability (ID)<br/>and/or delay<br/>relative to peers<br/>and/or non-verbal/<br/>limited speech</b> |
|-------------------------------------|------------------------------------------------------------------------|-------------------------------------------------------------------------------|----------------------------------------|-----------------------------------------------------------|--------------------------------------------------------------------------------------------------------------|---------------------------------------------------------|-----------------------------------------------------------|--------------------------------------------------------------------------------------------------------------------------------------------------------------|
| <b>Duignan and<br/>Connell 2015</b> | Lived<br>experience with<br>ASD (Australia)                            | Parents/ carers and<br>adult siblings of<br>children with ASD<br><sup>b</sup> | Not provided                           | 26/29                                                     | Not provided                                                                                                 | (2 - 57)                                                | Not given                                                 | Not given                                                                                                                                                    |
| <b>Dunlap et al.<br/>1994</b>       | Challenging<br>behaviour and<br>strategies (US)                        | Parents of children<br>with autism or<br>autistic features <sup>a</sup>       | Not provided                           | 72/78                                                     | Not provided                                                                                                 | 11.6 (2 - 38)                                           | 17/79                                                     | Not given                                                                                                                                                    |
| <b>Fairthorne et<br/>al. 2014</b>   | Experiences<br>impacting<br>mothers' quality<br>of life<br>(Australia) | Mothers of children<br>with autism and ID                                     | Not provided                           | 16/16                                                     | Not provided                                                                                                 | 15.6 (11 - 24)                                          | 6/17                                                      | 17/17 (reported to<br>have ID)                                                                                                                               |
| <b>Farrugia<br/>2009</b>            | Experience of<br>stigma<br>(Australia)                                 | Parents of children<br>with ASD                                               | Anglo-Saxon                            | 11/16                                                     | Not provided                                                                                                 | (5 - 23)                                                | Not given                                                 | Not given                                                                                                                                                    |
| <b>Fletcher et al.<br/>2012</b>     | Perceived costs<br>of caring<br>(Canada)                               | Mothers of children<br>with ASD                                               | Not provided                           | 8/8                                                       | All completed<br>high school or<br>college/<br>university                                                    | Not given,<br>maximum age<br>12                         | Not given                                                 | Not given                                                                                                                                                    |
| <b>Fong et al.<br/>1993</b>         | Experience of<br>parenting<br>(Canada)                                 | Parents of children<br>with autism                                            | Not provided                           | 6/8                                                       | All had at least<br>Grade 12<br>education,<br>several with<br>post-secondary<br>or professional<br>education | 14.2 (13 - 15)                                          | 1/6                                                       | 3/6 (behind age<br>peers academically)                                                                                                                       |

| <b>Author</b>                 | <b>Study focus/<br/>location</b>                                   | <b>Sample</b>                                                           | <b>Ethnicity<br/>(parent or child)</b>                 | <b>Proportion<br/>of parents<br/>who were<br/>mothers</b> | <b>Parent<br/>educational<br/>qualifications</b> | <b>Age of<br/>children<br/>[years] mean<br/>(range)</b> | <b>Proportion<br/>of children<br/>who were<br/>female</b> | <b>Proportion of<br/>children with<br/>intellectual<br/>disability (ID)<br/>and/or delay<br/>relative to peers<br/>and/or non-verbal/<br/>limited speech</b> |
|-------------------------------|--------------------------------------------------------------------|-------------------------------------------------------------------------|--------------------------------------------------------|-----------------------------------------------------------|--------------------------------------------------|---------------------------------------------------------|-----------------------------------------------------------|--------------------------------------------------------------------------------------------------------------------------------------------------------------|
| <b>Foo et al.<br/>2015</b>    | Lived experience with autism and challenging behaviour (Singapore) | Parents of children with ASD and aggression/challenging behaviour       | 83% Chinese, 17% Indian                                | 3/6                                                       | 16% High school; 33% College; 50% Advanced       | 12.8 (10 - 18)                                          | 2/6                                                       | 5/6 (diagnosed with autism rather than PDD-NOS or Asperger's)                                                                                                |
| <b>Gray 1993</b>              | Perceptions of stigma (Australia)                                  | Parents of children with autism                                         | Not provided                                           | 23/32                                                     | Modal value: high school                         | Not provided, includes under age 12                     | Not given                                                 | Not given                                                                                                                                                    |
| <b>Gray 1997</b>              | The construction of "normal family life" (Australia)               | Parents of children with high functioning autism or Asperger's syndrome | Not provided                                           | 32/53                                                     | Not provided                                     | (5 - 26), majority aged 9 - 14                          | Not given                                                 | Child N not given, all reported to have high-functioning autism or Asperger's                                                                                |
| <b>Gray 2003</b>              | Gender and parental coping (Australia)                             | Parents of children with high functioning autism or Asperger's syndrome | Not provided                                           | 32/53                                                     | Not provided                                     | (5-26), majority aged 9 - 14                            | Not given                                                 | Child N not given, all reported to have high-functioning autism or Asperger's                                                                                |
| <b>Hodgetts et al., 2013a</b> | Experience/outcomes of intervention (Canada)                       | Parents of children with ASD                                            | 60% Caucasian; 20% Middle Eastern; 20% Southeast Asian | 10/15                                                     | Not provided                                     | 8.2 (5 - 12)                                            | 2/10                                                      | 5/10 (report of very low adaptive functioning/ cognition untestable)                                                                                         |
| <b>Hodgetts et al. 2013b</b>  | Experiences with aggression (Canada)                               | Parents of children with ASD                                            | 100% Caucasian                                         | 8/9                                                       | All had at least a high school diploma           | (6 - 29), majority aged 6 - 10                          | 0/9                                                       | 5/9 (moderate to severe ID reported by parents)                                                                                                              |
| <b>Hutton and Caron 2005</b>  | Lived experience (US)                                              | Parents of children with autism                                         | Not provided                                           | 19/21                                                     | Not provided                                     | (3-16)                                                  | 4/21                                                      | Not given                                                                                                                                                    |

| <b>Author</b>                        | <b>Study focus/<br/>location</b>                        | <b>Sample</b>                                                                                   | <b>Ethnicity<br/>(parent or child)</b>              | <b>Proportion<br/>of parents<br/>who were<br/>mothers</b> | <b>Parent<br/>educational<br/>qualifications</b>                    | <b>Age of<br/>children<br/>[years] mean<br/>(range)</b> | <b>Proportion<br/>of children<br/>who were<br/>female</b> | <b>Proportion of<br/>children with<br/>intellectual<br/>disability (ID)<br/>and/or delay<br/>relative to peers<br/>and/or non-verbal/<br/>limited speech</b> |
|--------------------------------------|---------------------------------------------------------|-------------------------------------------------------------------------------------------------|-----------------------------------------------------|-----------------------------------------------------------|---------------------------------------------------------------------|---------------------------------------------------------|-----------------------------------------------------------|--------------------------------------------------------------------------------------------------------------------------------------------------------------|
| <b>Johnson et al. 2014</b>           | Challenging behaviour in hospitalised children (US)     | Mothers and health-care providers of children with ASD <sup>c</sup>                             | 80% Caucasian, 20% African American                 | 5/5                                                       | 20% High school; 40% College; 40% Advanced                          | (5 - 12)                                                | Not given                                                 | Not given                                                                                                                                                    |
| <b>Koydemir-Özden and Tosun 2010</b> | Lived experience: Turkish mothers (Turkey)              | Mothers of children with autism                                                                 | Not provided                                        | 13/13                                                     | Not provided                                                        | (7-14)                                                  | Not given                                                 | Not given                                                                                                                                                    |
| <b>Kuhaneck et al. 2010</b>          | Maternal coping (US)                                    | Mothers of children with ASD                                                                    | 82% Caucasian; 18% African American                 | 11/11                                                     | Not provided                                                        | 8.3 (6-11)                                              | Not given                                                 | Not given                                                                                                                                                    |
| <b>Larson 2006</b>                   | Children's propensity for routinization (US)            | Mothers of children with ASD plus an additional difficulty (e.g. non-verbal, problem behaviour) | Varied                                              | 9/9                                                       | Not provided                                                        | 8.7 (3 - 14)                                            | 0/10                                                      | 6/10 (diagnosed with autism rather than PDD-NOS or Asperger's)                                                                                               |
| <b>Larson 2010</b>                   | Maternal support of participation in everyday life (US) | Parents of children with ASD                                                                    | 67% Caucasian, 11% Mixed, 11% Chinese, 11% Hispanic | 9/9                                                       | Not provided                                                        | (3 - 14)                                                | 0/10                                                      | 1/10 (the rest reported by parents to be high-functioning)                                                                                                   |
| <b>Lasser and Corley 2008</b>        | Parenting (US)                                          | Parents of children with Asperger's disorder                                                    | Not provided                                        | 19/20                                                     | 10% High school; 40% College; 40% Graduate school; 10% not reported | 11.98                                                   | 3/21                                                      | 0/21 (all had a diagnosis of Asperger's)                                                                                                                     |

| <b>Author</b>                   | <b>Study focus/<br/>location</b>                      | <b>Sample</b>                   | <b>Ethnicity<br/>(parent or child)</b>                              | <b>Proportion<br/>of parents<br/>who were<br/>mothers</b> | <b>Parent<br/>educational<br/>qualifications</b>                   | <b>Age of<br/>children<br/>[years] mean<br/>(range)</b> | <b>Proportion<br/>of children<br/>who were<br/>female</b> | <b>Proportion of<br/>children with<br/>intellectual<br/>disability (ID)<br/>and/or delay<br/>relative to peers<br/>and/or non-verbal/<br/>limited speech</b> |
|---------------------------------|-------------------------------------------------------|---------------------------------|---------------------------------------------------------------------|-----------------------------------------------------------|--------------------------------------------------------------------|---------------------------------------------------------|-----------------------------------------------------------|--------------------------------------------------------------------------------------------------------------------------------------------------------------|
| <b>Ludlow et al. 2012</b>       | Challenges faced by parents of children with ASD (UK) | Parents of children with ASD    | Not provided                                                        | 14/20                                                     | Not provided                                                       | (4 - 29), majority aged 4 - 14                          | Not given                                                 | 8/14 (diagnosed with autism rather than PDD-NOS or Asperger's)                                                                                               |
| <b>Lutz et al. 2012</b>         | Familial coping/adaptation (US)                       | Mothers of children with autism | 88% Caucasian, 12% African American                                 | 16/16                                                     | Not provided                                                       | (2 - 31), majority under 18                             | 1/16                                                      | 16/16 (diagnosed with "classic autism")                                                                                                                      |
| <b>Marquenie et al. 2011</b>    | Dinner and bedtimes routines and rituals (Australia)  | Mothers of children with ASD    | Not provided                                                        | 14/14                                                     | 21% High school; 14% College; 57% Advanced; 7% Technical education | 3.4 (3 - 4)                                             | Not given                                                 | Not given                                                                                                                                                    |
| <b>Marshall and Long 2010</b>   | Maternal coping processes (Canada)                    | Mothers of children with autism | 100% Caucasian                                                      | 5/5                                                       | 40% Secondary school; 60% University                               | (6-11)                                                  | Not given                                                 | Not given                                                                                                                                                    |
| <b>Mount and Dillon 2014</b>    | Lived experience (UK)                                 | Parents of children with ASD    | 100% Caucasian                                                      | 5/9                                                       | Not provided                                                       | 13 (11 - 16)                                            | 1/6                                                       | Not given                                                                                                                                                    |
| <b>Myers et al. 2009</b>        | Lived experience: impact on parents' lives (US)       | Parents of children with ASD    | 87% Caucasian, 6% Mixed, 2% African American, 2% Hispanic, 3% other | 455/493                                                   | 14% High school; 41% College; 37% Advanced                         | 8.6 (1 - 21)                                            | 99/493                                                    | 295/493 (diagnosed with autism rather than PDD-NOS or Asperger's)                                                                                            |
| <b>Neely-Barnes et al. 2011</b> | Parenting & public perceptions (US)                   | Parents of children with ASD    | 46% Caucasian; 36% African American; 9% Asian American; 9% Latina   | 9/11                                                      | 37% High school; 27% Some college; 9% College degree; 27% Graduate | 7.2 (1-15)                                              | 5/14                                                      | Not given                                                                                                                                                    |

| <b>Author</b>                | <b>Study focus/<br/>location</b>                                         | <b>Sample</b>                                                                                  | <b>Ethnicity<br/>(parent or child)</b> | <b>Proportion<br/>of parents<br/>who were<br/>mothers</b> | <b>Parent<br/>educational<br/>qualifications</b>      | <b>Age of<br/>children<br/>[years] mean<br/>(range)</b> | <b>Proportion<br/>of children<br/>who were<br/>female</b> | <b>Proportion of<br/>children with<br/>intellectual<br/>disability (ID)<br/>and/or delay<br/>relative to peers<br/>and/or non-verbal/<br/>limited speech</b> |
|------------------------------|--------------------------------------------------------------------------|------------------------------------------------------------------------------------------------|----------------------------------------|-----------------------------------------------------------|-------------------------------------------------------|---------------------------------------------------------|-----------------------------------------------------------|--------------------------------------------------------------------------------------------------------------------------------------------------------------|
| <b>Pengelly et al. 2009</b>  | Home environment (UK)                                                    | Mothers of children with ASD                                                                   | Not provided                           | 3/3                                                       | Not provided                                          | (8 - 10)                                                | 0/3                                                       | Not given                                                                                                                                                    |
| <b>Pepperell et al. 2016</b> | Parents' social support and coping strategies (Australia)                | Parents of children with ASD                                                                   | Not provided                           | 10/19                                                     | 26% High school; 32% College/vocational; 42% Advanced | 4.1 (3 - 4)                                             | 4/10                                                      | Not given                                                                                                                                                    |
| <b>Preece 2014</b>           | Follow up of behavioural support and physical intervention training (UK) | Parents of children with ASD or ADHD and challenging behaviour <sup>a</sup>                    | Not provided                           | Not given                                                 | Not provided                                          | 9.7 (7 - 11)                                            | Not given                                                 | Not given                                                                                                                                                    |
| <b>Ryan 2010</b>             | Going out in the community (UK)                                          | Parents of children with ASD                                                                   | Mostly Caucasian                       | 36/48                                                     | Not provided                                          | (3 - 53)                                                | Not given                                                 | Not given                                                                                                                                                    |
| <b>Safe et al. 2012</b>      | Lived experience: mothers (Australia)                                    | Mothers of children with autism                                                                | 86% Caucasian; 14% Asian               | 7/7                                                       | 14% Certificate; 43% Year 12; 43% Degree              | (6-12)                                                  | 2/9                                                       | 9/9 (diagnosed with autism rather than PDD-NOS or Asperger's)                                                                                                |
| <b>Schaaf et al. 2011</b>    | Everyday routines (US)                                                   | Parents of children with ASD and sensory difficulties                                          | 100% Caucasian                         | 4/5                                                       | 100% College degree                                   | 8.25 (7-12)                                             | Not given                                                 | Not given                                                                                                                                                    |
| <b>Shaked 2005</b>           | Lived experience: ultraorthodox community (Israel)                       | Parents of children assessed as autistic (18/30 had a formal diagnosis of an ASD) <sup>a</sup> | Not provided                           | 29/32                                                     | Not provided                                          | Not provided, includes children aged under 18           | Not given                                                 | 16/30 (diagnosed with autism rather than PDD-NOS or Asperger's)                                                                                              |

| Author                        | Study focus/<br>location                                         | Sample                                                                                               | Ethnicity<br>(parent or child) | Proportion<br>of parents<br>who were<br>mothers | Parent<br>educational<br>qualifications   | Age of<br>children<br>[years] mean<br>(range) | Proportion<br>of children<br>who were<br>female | Proportion of<br>children with<br>intellectual<br>disability (ID)<br>and/or delay<br>relative to peers<br>and/or non-verbal/<br>limited speech |
|-------------------------------|------------------------------------------------------------------|------------------------------------------------------------------------------------------------------|--------------------------------|-------------------------------------------------|-------------------------------------------|-----------------------------------------------|-------------------------------------------------|------------------------------------------------------------------------------------------------------------------------------------------------|
| <b>Stoner et al. 2007</b>     | Parent perspectives on transitions (US)                          | Parents of children with ASD                                                                         | Not provided                   | 4/8                                             | Not provided                              | 7 (6 - 8)                                     | 0/4                                             | 3/4 (non-verbal/limited speech)                                                                                                                |
| <b>Turnbull and Ruef 1996</b> | Family perspectives on problem behaviour (US)                    | Parents of children with ID and problem behaviour, (almost all reported to have autism) <sup>a</sup> | 76% Caucasian, 24% Latino      | 15/20                                           | Broad range                               | 14 (2 - 36)                                   | Not given                                       | 17/17 (Diagnosis of ID)                                                                                                                        |
| <b>Weiss et al. 2014</b>      | Experience of crisis (Canada)                                    | Mothers of children with ASD                                                                         | 89% Caucasian                  | 155/155                                         | Not provided                              | 15.3 (5 - 48)                                 | 28/155                                          | 78/155 (diagnosed with autism rather than PDD-NOS or Asperger's)                                                                               |
| <b>Woodgate et al. 2008</b>   | Lived experience (Canada)                                        | Parents of children with autism                                                                      | 90% Caucasian; 10% Asian       | 16/21                                           | Not provided                              | (3 - 9)                                       | 1/16                                            | Not given, sample reportedly varied in severity                                                                                                |
| <b>Zhou and Yi 2014</b>       | Parenting styles & emotions: impact on child functioning (China) | Parents of children with ASD                                                                         | Not provided                   | 25/32                                           | 13% High school; 0% College; 87% Advanced | 6.8 (2 - 17)                                  | 1/28                                            | Not given                                                                                                                                      |

Abbreviations: US = United States of America; UK = United Kingdom; ASD = Autism spectrum disorder; PDD-NOS = Pervasive developmental disorder not otherwise specified; ID = intellectual disability; GAD = Generalised Anxiety Disorder; ODD = Oppositional Defiant Disorder; OCD = Obsessive compulsive disorder. Notes: <sup>a</sup> study includes a minority of children without an ASD; <sup>b</sup> study includes a minority of other relatives or carers (e.g. grandparents, siblings); <sup>c</sup> study includes a larger proportion not diagnosed with ASD or another non-parent informant group, but exemplars are drawn from/about ASD sample and/or parents only.

**Supplementary Table 4: Summary of themes and references for exemplars coded as belonging to each subtheme**

|    | <b>Sub-theme</b>                                                                  | <b>References for exemplars coded as belonging to each subtheme</b>                                                                                                                                                                                                                                                                             |
|----|-----------------------------------------------------------------------------------|-------------------------------------------------------------------------------------------------------------------------------------------------------------------------------------------------------------------------------------------------------------------------------------------------------------------------------------------------|
|    | <b><i>(1) Accommodating the child</i></b>                                         |                                                                                                                                                                                                                                                                                                                                                 |
| 1  | Adapt routines to accommodate the child                                           | Ausderau and Juarez 2013; Bagatell 2016; Clarke et al. 1999; Duignan and Connell 2015; Farrugia 2009; Lucyshyn et al. 2004; Marquenie et al. 2011; Schaaf et al. 2011                                                                                                                                                                           |
| 2  | Plan activities to accommodate the child                                          | Farrugia 2009; Fletcher et al. 2012; Hutton and Carron 2005; Larson 2006; Lucyshyn et al. 2004; Lutz et al. 2012; Mount and Dillon 2014; Schaaf et al. 2011; Sears et al. 2013; Stoner et al. 2007                                                                                                                                              |
| 3  | Adjust expectations depending on the child's mood                                 | DeGrace 2004; Fletcher et al. 2012; Foo et al. 2015; Gray 2003; Larson 2006; Safe et al. 2012; Schaaf et al. 2011                                                                                                                                                                                                                               |
| 4  | Set priorities and pick battles                                                   | Ausderau and Juarez 2013; DeGrace 2004; Farrugia 2009; Larson 2006; Marquenie et al. 2011; Safe et al. 2012                                                                                                                                                                                                                                     |
| 5  | Give the child latitude over rules                                                | Ausderau and Juarez 2013; Bagatell 2016; Herbert 2014; Bearss et al. 2016; DeGrace 2004; Foo et al. 2015; Larson 2006; Marquenie et al. 2011; Pengelly et al. 2009; Turnbull and Ruef 1996                                                                                                                                                      |
| 6  | Reduce demands when problem behavior occurs                                       | Becker-Cottrill et al. 2003; Clarke et al. 1999; Foo et al. 2015; Johnson et al. 1978; Larson 2006; Lucyshyn et al. 2004; Lucyshyn et al. 2007; Neufeld et al. 2014; Sears et al. 2013                                                                                                                                                          |
| 7  | Give in to the child's demands                                                    | Armstrong et al. 2015; Aylaz et al. 2012; Bagatell 2016; DeGrace 2004; Divan et al. 2012; Duignan and Connell 2015; Fettig et al. 2015; Fletcher et al. 2012; Hodgetts et al. 2013b; Koydemir-Özden and Tosun 2010; Lucyshyn et al. 2004; Lucyshyn et al. 2007                                                                                  |
|    | <b><i>(2) Modifying the environment</i></b>                                       |                                                                                                                                                                                                                                                                                                                                                 |
| 8  | Limit the child's exposure to sensory stimuli they find aversive                  | Bagatell 2016; Dickie et al. 2009; Duignan and Connell 2015; Larson 2010; Lucyshyn et al. 2004; Ludlow et al. 2012; Mount and Dillon 2014; Schaaf et al. 2011; Sears et al. 2013                                                                                                                                                                |
| 9  | Avoid situations (e.g. activities, events, places) that the child finds difficult | Ausderau and Juarez 2013; Bagatell 2016; Divan et al. 2012; Fairthorne et al. 2014; Fletcher et al. 2012; Gray 1997; Gray 2003; Johnson et al. 2014; Larson 2006; Mount and Dillon 2014; Ryan 2010; Schaaf et al. 2011                                                                                                                          |
| 10 | Limit social activities and outings with the child                                | Bagatell 2016; DeGrace et al. 2014; Divan et al. 2012; Duignan and Connell 2015; Gray 2003; Fairthorne et al. 2014; Fletcher et al. 2012; Hodgetts et al. 2013a; Hodgetts et al. 2013b; Larson 2006; Lucyshyn et al. 2007; Mount and Dillon 2014; Myers et al. 2009; Neufeld et al. 2014; Preece and Almond 2008; Ryan 2010; Schaaf et al. 2011 |

|    | <b>Sub-theme</b>                                                             | <b>References for exemplars coded as belonging to each subtheme</b>                                                                                                                                                                                                                                                                                                       |
|----|------------------------------------------------------------------------------|---------------------------------------------------------------------------------------------------------------------------------------------------------------------------------------------------------------------------------------------------------------------------------------------------------------------------------------------------------------------------|
|    | <b><i>(3) Providing structure, routine and familiarity</i></b>               |                                                                                                                                                                                                                                                                                                                                                                           |
| 11 | Stick to fixed routines to manage daily activities                           | Agazzi et al. 2013; Farrugia 2009; Fong et al. 1993; Hutton and Carron 2005; Kuhaneck et al. 2010; Larson 2006; Ludlow et al. 2012; Mount and Dillon 2014; Safe et al. 2012; Schaaf et al. 2011; Turnbull and Ruef 1996                                                                                                                                                   |
| 12 | Provide structure and occupation for the child at all times                  | DeGrace 2004; Duignan and Connell 2015; Dunlap et al. 1994; Johnson et al. 2014; Larson 2006; Marquenie et al. 2011; Pepperell et al. 2016; Schaaf et al. 2011; Turnbull and Ruef 1996                                                                                                                                                                                    |
| 13 | Use picture schedules or lists to inform the child about upcoming activities | Bagatell 2016; Clarke et al. 1999; Fettig et al. 2015; Johnson et al. 2014; Larson 2010; Scarpinto et al. 2010; Schaaf et al. 2011; Stoner et al. 2007; Turnbull and Ruef 1996                                                                                                                                                                                            |
| 14 | Inform the child in advance about any changes in routine                     | Bagatell 2016; Duignan and Connell 2015; Gray 1997; Larson 2006; Ludlow et al. 2012; Mount and Dillon 2014; Scarpinto et al. 2010                                                                                                                                                                                                                                         |
| 15 | Prepare the child for events by giving details in advance                    | Bearss et al. 2016; Gray 1997; Johnson et al. 2014; Larson 2006; Ludlow et al. 2012; Marshall and Long 2010; Ryan 2010; Schaaf et al. 2011; Sears et al. 2013                                                                                                                                                                                                             |
| 16 | Keep things as predictable and familiar as possible                          | Gray 1997; Johnson et al. 2014; Kuhaneck et al. 2010; Larson 2006; Ludlow et al. 2012; Safe et al. 2012; Stoner et al. 2007                                                                                                                                                                                                                                               |
| 17 | Introduce new things gradually                                               | Ausderau and Juarez 2013; Fong et al. 1993; Larson 2006; Larson 2010; Marquenie et al. 2011; Schaaf et al. 2011; Stoner et al. 2007                                                                                                                                                                                                                                       |
|    | <b><i>(4) Supervision and monitoring</i></b>                                 |                                                                                                                                                                                                                                                                                                                                                                           |
| 18 | Supervise the child at all times                                             | Bourke-Taylor et al. 2010; DeGrace 2004; Duignan and Connell 2015; Fairthorne et al. 2014; Fletcher et al. 2012; Fong et al. 1993; Hampshire et al. 2011; Hodgetts et al. 2013a; Koydemir-Özden and Tosun 2010; Larson 2010; Lutz et al. 2012; Marshall and Long 2010; Myers et al. 2009; Schaaf et al. 2011; Turnbull and Ruef 1996; Weiss et al. 2014; Zhou and Yi 2014 |
| 19 | Stay alert and ready to intervene                                            | Barry and Singer 2001; Bourke-Taylor et al. 2010; DeGrace et al. 2014; Hodgetts et al. 2013a; Larson 2010; Marshall and Long 2010; Myers et al. 2009; Ryan 2010; Safe et al. 2012; Schaaf et al. 2011; Woodgate et al. 2008                                                                                                                                               |
| 20 | Make an effort to keep the child's mood stable                               | Gray 1997; Larson 2010; Sabapathy et al. 2016; Woodgate et al. 2008                                                                                                                                                                                                                                                                                                       |
| 21 | Be vigilant to identify possible triggers                                    | Hutton and Carron 2005; Larson 2010; Schaaf et al. 2011                                                                                                                                                                                                                                                                                                                   |



|    | <b>Sub-theme</b>                                                             | <b>References for exemplars coded as belonging to each subtheme</b>                                                                                                                                                           |
|----|------------------------------------------------------------------------------|-------------------------------------------------------------------------------------------------------------------------------------------------------------------------------------------------------------------------------|
|    | <b><i>(5) Managing non-compliance with everyday tasks and activities</i></b> |                                                                                                                                                                                                                               |
| 22 | Intervene to assist the child with daily activities                          | Bailey and Blair 2015; Blair et al. 2011; Clarke et al. 1999; Fletcher et al. 2012; Larson 2006; Larson 2010; Lucyshyn et al. 2004; Lucyshyn et al. 2007; Mount and Dillon 2014; Neufeld et al. 2014; Turnbull and Ruef 1996  |
| 23 | Give the child repeated cues to do things                                    | Armstrong et al. 2015; DeGrace 2004; Fettig et al. 2015; Flood and Luiselli 2016; Hampshire et al. 2011; Larson 2010; Marquenie et al. 2011; Neufeld et al. 2014; Ökcün and Akçin 2012; Sears et al. 2013; Vaughn et al. 2002 |
| 24 | Use strategies when making demands                                           | Bearss et al. 2016; Johnson et al. 2014; Larson 2006; Cullen and Barlow 2002; Larson 2006                                                                                                                                     |
| 25 | Use gentle persuasion to coax the child into doing things                    | Agazzi et al. 2013; Neely-Barnes et al. 2011                                                                                                                                                                                  |
| 26 | Use reward systems to motivate good behaviour                                | Armstrong et al. 2013; Bagatell 2016; Dunlap et al. 1994; Fettig et al. 2015; Fong et al. 1993; Johnson et al. 2014; Schaaf et al. 2011                                                                                       |
| 27 | Praise the child for appropriate behaviour                                   | Agazzi et al. 2013; Armstrong et al. 2013                                                                                                                                                                                     |
| 28 | Persist with routine demands despite protests                                | Marquenie et al. 2011; Mount and Dillon 2014; Sears et al. 2013; Stoner et al. 2007                                                                                                                                           |
|    | <b><i>(6) Responding to problem behaviour</i></b>                            |                                                                                                                                                                                                                               |
| 29 | Distract the child with activities                                           | Bagatell 2016; Cullen and Barlow 2002; Duignan and Connell 2015; Fettig et al. 2015; Johnson et al. 2014; Larson 2006; Marshall and Long 2010; Sears et al. 2013; Weiss et al. 2014                                           |
| 30 | Ignore the child's demands                                                   | Bailey and Blair 2015; Dunlap et al. 1994; Gray 1993; Marquenie et al. 2011; Neely-Barnes et al. 2011                                                                                                                         |
| 31 | Teach the child what is appropriate behaviour                                | Armstrong et al. 2013; Beer et al. 2013; Dunlap et al. 1994; Johnson et al. 2014; Larson 2006; Ökcün and Akçin 2012; Woodgate et al. 2008                                                                                     |
| 32 | Give verbal reprimands in response to problem behaviour                      | Blair et al. 2011; Dunlap et al. 1994; Gray 1993; Sears et al. 2013                                                                                                                                                           |
| 33 | Establish boundaries by setting ground rules                                 | Agazzi et al. 2013; Herbert 2014; Johnson et al. 1978; Pengelly et al. 2009; Ryan 2010                                                                                                                                        |
| 34 | Give punishments by removing items or privileges                             | Armstrong et al. 2013; Armstrong et al. 2015; Herbert 2014; Moes and Frea 2000                                                                                                                                                |
| 35 | Shout/ yell and convey negative affect in response to problem behaviour      | Bailey and Blair 2015; Barry and Singer 2001; Blair et al. 2011; Gray 2003; Sears et al. 2013; Vaughn et al. 2002                                                                                                             |
| 36 | Put the child in time-out in response to problem behaviour                   | Armstrong et al. 2013; Armstrong et al. 2015; Blair et al. 2011; Dunlap et al. 1994; Fong et al. 1993                                                                                                                         |

|    | <b>Sub-theme</b>                                                 | <b>References for exemplars coded as belonging to each subtheme</b>                                                                                                                                                                                         |
|----|------------------------------------------------------------------|-------------------------------------------------------------------------------------------------------------------------------------------------------------------------------------------------------------------------------------------------------------|
| 37 | Use physical punishment in response to problem behaviour         | Armstrong et al. 2015; Fairthorne et al. 2014                                                                                                                                                                                                               |
|    | <b><i>(7) Managing distress</i></b>                              |                                                                                                                                                                                                                                                             |
| 38 | Comfort the child when they are having an outburst               | Bearss et al. 2016; Becker-Cottrill et al. 2003; Bourke-Taylor et al. 2010; Flood and Luiselli 2016; Johnson et al. 2014; Lucyshyn et al. 2004; Ludlow et al. 2012; Neely-Barnes et al. 2011; Schaaf et al. 2011; Turnbull and Ruef 1996; Weiss et al. 2014 |
|    | <b><i>(8) Maintaining safety</i></b>                             |                                                                                                                                                                                                                                                             |
| 39 | Physically contain the child                                     | Aylaz et al. 2012; Bourke-Taylor et al. 2010; DeGrace et al. 2014; Fairthorne et al. 2014; Hodgetts et al. 2013a; Hutton and Carron 2005; Myers et al. 2009; Neely-Barnes et al. 2011                                                                       |
| 40 | Keep the child in a different room away from his/her siblings    | Gray 1997; Gray 2003; Hodgetts et al. 2013a                                                                                                                                                                                                                 |
| 41 | Restrict access to valued possessions                            | Bourke-Taylor et al. 2010; Duignan and Connell 2015; Farrugia 2009; Gray 1997; Hodgetts et al. 2013a; Hutton and Carron 2005                                                                                                                                |
| 42 | Physically restrain the child in response to dangerous behaviour | Agazzi et al. 2013; Bailey and Blair 2015; Barry and Singer 2001; Blair et al. 2011; Bourke-Taylor et al. 2010; Gray 1997; Larson 2010; Ludlow et al. 2012; Preece and Almond 2008; Preece 2014; Sears et al. 2013; Weiss et al. 2014                       |
|    | <b><i>(9) Analysing and planning</i></b>                         |                                                                                                                                                                                                                                                             |
| 43 | Think about what brought on an episode of problem behaviour      | Farrugia 2009; Hieneman and Dunlap 2000; Larson 2006; Larson 2010; Whittingham et al. 2006                                                                                                                                                                  |
| 44 | Anticipate problems that the child might have in a situation     | Farrugia 2009; Fletcher et al. 2012; Gray 2003; Larson 2010; Lasser 2008; Safe et al. 2012; Schaaf et al. 2011; Stoner et al. 2007                                                                                                                          |
| 45 | Make contingency plans for outings                               | Bagatell 2016; Gray 2003; Larson 2006; Marshall and Long 2010; Pepperell et al. 2016; Schaaf et al. 2011                                                                                                                                                    |
